# Supplementary material for: Prevalence and Indicators of Vitamin B12 Insufficiency among Young Women of Childbearing Age
Source: PubMed Central journal article supplement (PMC7792587; doi:10.3390/ijerph18010001), 2020-12-22
Supplement: ijerph-18-00001-s001.pdf [file ijerph-18-00001-s001.pdf]

**Table 1.** Participants' sociodemographic characteristics according to vitamin B12 status.

|                               | Overall  | Insufficient<br>( $\leq 220$ pmol/L) | Sufficient<br>( $> 220$ pmol/L) | <i>P</i> |
|-------------------------------|----------|--------------------------------------|---------------------------------|----------|
| N (%)                         |          | 21 (6.1)                             | 325 (93.9)                      |          |
| <b>Socio-demographic data</b> |          |                                      |                                 |          |
| <b>Department</b>             |          |                                      |                                 |          |
| Medical                       | 114 (32) | 4 (19)                               | 107 (33)                        | 0.32     |
| Science                       | 118 (33) | 7 (33)                               | 108 (33)                        |          |
| Humanities                    | 123 (35) | 10 (48)                              | 110 (34)                        |          |
| <b>College level</b>          |          |                                      |                                 |          |
| < 5 semesters completed       | 189 (53) | 12 (57)                              | 173 (53.2)                      | 0.73     |
| $\geq 5$ semesters completed  | 166 (47) | 9 (43)                               | 152 (46.8)                      |          |
| <b>Housing</b>                |          |                                      |                                 |          |
| Apartment                     | 26 (7.6) | 0 (0.0)                              | 26 (8.0)                        | 0.57     |
| Villa                         | 300 (88) | 19 (95)                              | 281 (87)                        |          |
| Women' housing                | 15 (4.4) | 1 (5.0)                              | 14 (4.3)                        |          |
| Faculty member housing        | 2 (0.6)  | 0 (0.0)                              | 2 (0.6)                         |          |
| <b>Marital status</b>         |          |                                      |                                 |          |
| Married                       | 9 (2.5)  | 0 (0.0)                              | 9 (2.8)                         | 1.00     |
| Single                        | 345 (97) | 21 (100)                             | 315 (97)                        |          |
| Divorced                      | 1 (0.3)  | 0 (0.0)                              | 1 (0.3)                         |          |

Data are presented as means  $\pm$  SDs; other non-normal variables are presented as medians (Quartiles 1–3). *P* values were obtained using the independent sample t-test and the Mann-Whitney U test for normal and non-normal variables, respectively. N (%) was used for categorical variables. *P* values for categorical variables were obtained using Fisher's exact test.  $P < 0.05$  was considered significant.

**Table S2.** Indicators of vitamin B12 serum by quartiles among women of childbearing age

|                                 | Quartile 1 ( $\leq 305.8$ pmol/l) |         | Quartile 2 (305.9 - 398.9 pmol/l) |         | Quartile 3 (399.0 - 534.6 pmol/l) |         |
|---------------------------------|-----------------------------------|---------|-----------------------------------|---------|-----------------------------------|---------|
|                                 | OR (95%CI)                        | P-value | OR (95%CI)                        | P-value | OR (95%CI)                        | P-value |
| Age (y)                         | 1.04 (0.84 - 1.30)                | 0.71    | 1.00 (0.79 - 1.26)                | 0.98    | 0.92 (0.71 - 1.19)                | 0.52    |
| BMI (kg/m <sup>2</sup> )        | 1.02 (0.96 - 1.09)                | 0.53    | 1.01 (0.94 - 1.08)                | 0.77    | 1.00 (0.93 - 1.08)                | 0.99    |
| Glucose level ( $> 5.6$ mmol/L) | 0.61 (0.18 - 2.03)                | 0.42    | 0.96 (0.30 - 3.06)                | 0.94    | 2.19 (0.77 - 6.21)                | 0.14    |
| VB12 intake ( $> 2.4$ mcg/d)    | 0.28 (0.05 - 1.75)                | 0.17    | 0.22 (0.04 - 1.32)                | 0.09    | 1.81 (0.16 - 20.15)               | 0.62    |
| Using protein supplement        | 0.32 (0.02 - 4.30)                | 0.39    | 0.40 (0.03 - 5.33)                | 0.48    | 3.56 (0.61 - 20.68)               | 0.15    |
| Protein intake ( $> 46$ g/d)    | 0.40 (0.03 - 4.59)                | 0.46    | 0.91 (0.07 - 12.00)               | 0.94    | 0.36 (0.02 - 5.73)                | 0.47    |
| Coffee intake ( $> 750$ mL/d)   | 2.00 (0.32 - 12.40)               | 0.45    | 1.73 (0.26 - 11.43)               | 0.57    | 0.47 (0.04 - 5.61)                | 0.55    |
| Income ( $< 10,000$ SAR)        | 2.01 (0.77 - 5.23)                | 0.15    | 2.06 (0.78 - 5.45)                | 0.14    | 1.84 (0.68 - 4.98)                | 0.22    |

|                                               |                    |      |                    |      |                    |      |
|-----------------------------------------------|--------------------|------|--------------------|------|--------------------|------|
| Sitting time ( $\geq 7$ h/d)                  | 1.89 (0.94 - 3.78) | 0.07 | 0.70 (0.34 - 1.44) | 0.33 | 1.25 (0.61 - 2.59) | 0.54 |
| Vigorous physical activity ( $\geq 60$ min/w) | 0.95 (0.39 - 2.33) | 0.90 | 1.35 (0.55 - 3.35) | 0.51 | 0.67 (0.24 - 1.88) | 0.44 |

---

OR's are obtained from multinomial regression analysis while taking Quartile 4 ( $>534.6$  pmol/l) as reference category
